# Supplementary material
Source: MDPI journal article supplement (https://www.mdpi.com/2072-4292/8/11/950)
Supplement: s1 [file s1]

# Supplementary Materials: An Alternative Quality Control Technique for Mineral Chemistry Analysis of Portland Cement-Grade Limestone Using Shortwave Infrared Spectroscopy

Nasrullah Zaini, Freek van der Meer, Frank van Ruitenbeek, Boudewijn de Smeth, Fadli Amri and Caroline Lievens

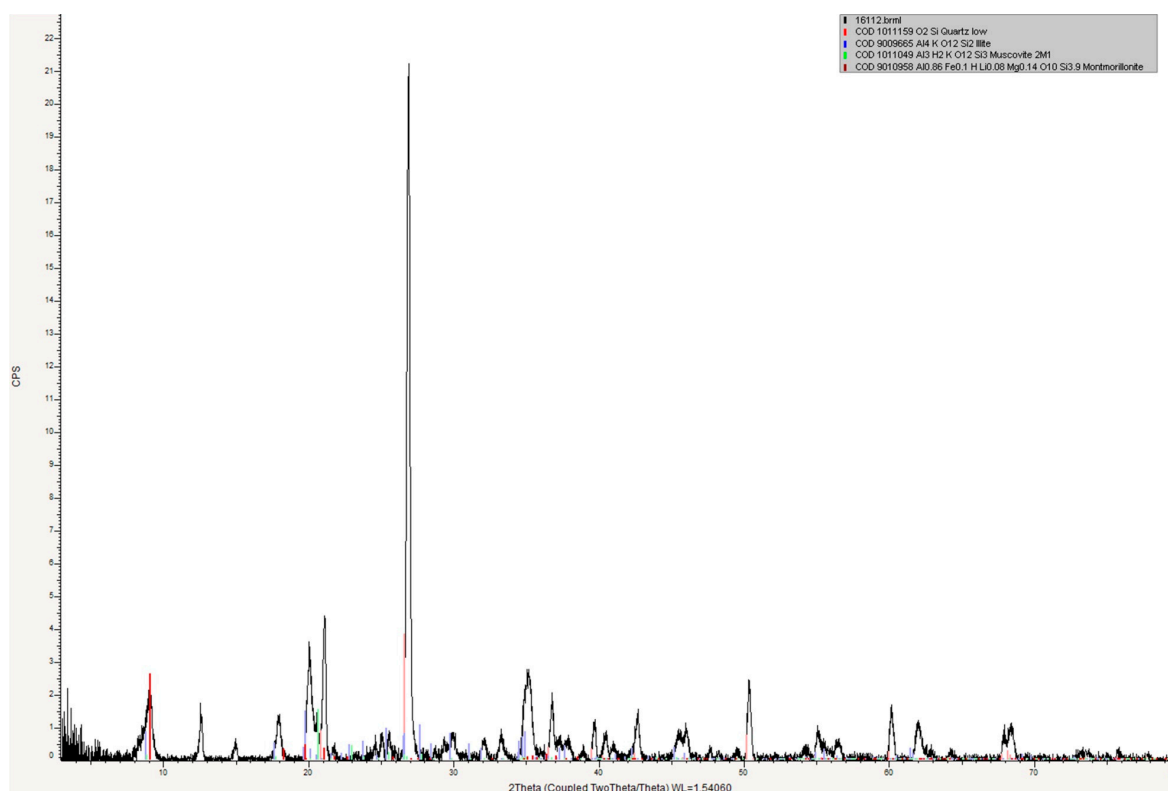

**Figure S1.** XRD pattern of clay and other phyllosilicate minerals of selected dark gray and light gray limestone samples, showing the presence of montmorillonite, illite and muscovite in the rock samples.

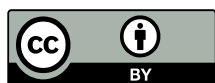

© 2016 by the authors; licensee MDPI, Basel, Switzerland. This article is an open access article distributed under the terms and conditions of the Creative Commons Attribution (CC-BY) license (<http://creativecommons.org/licenses/by/4.0/>).
